# Supplementary material for: Preclinical Development of [211At]meta- astatobenzylguanidine ([211At]MABG) as an Alpha Particle Radiopharmaceutical Therapy for Neuroblastoma
Source: PubMed Central journal article supplement — Clin Cancer Res. 2022 Jul 21;28(18):4146–57. doi: 10.1158/1078-0432.CCR-22-0400 (PMC9475242; doi:10.1158/1078-0432.ccr-22-0400), 2022-07-21
Supplement: ccr-22-0400_figure_s2_supps2.pdf [file ccr-22-0400_figure_s2_supps2.pdf]

Figure S2

A

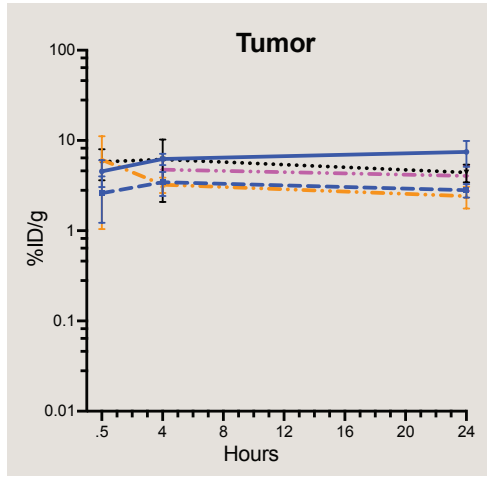

B

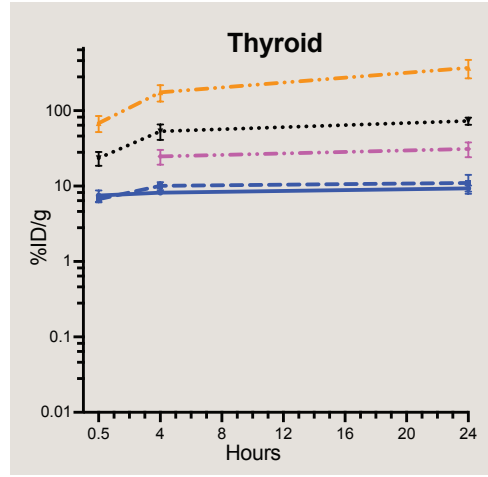

C

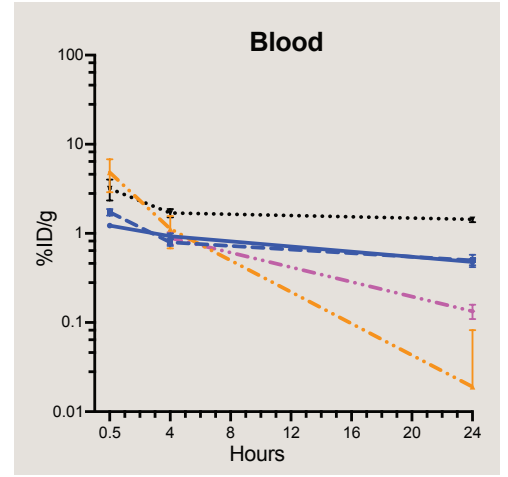

D

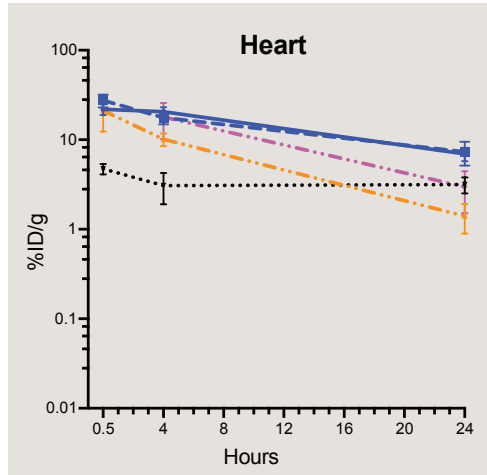

E

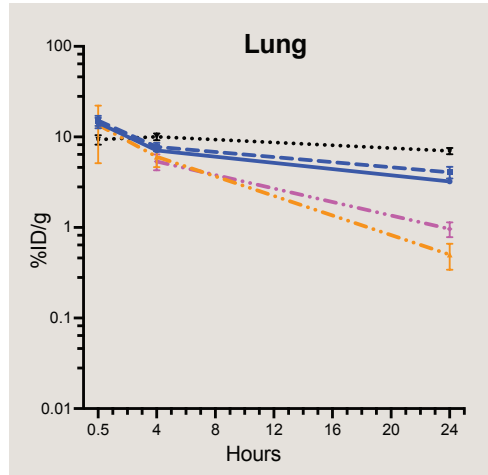

F

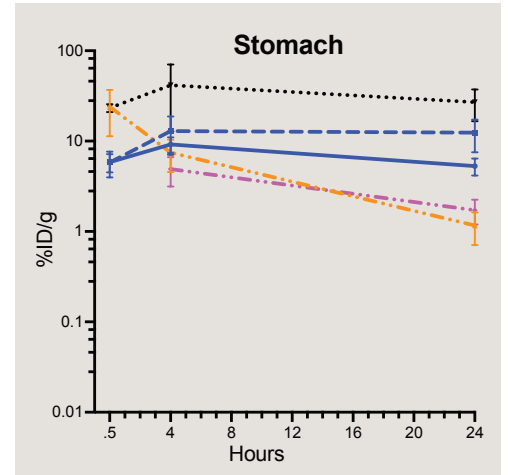

G

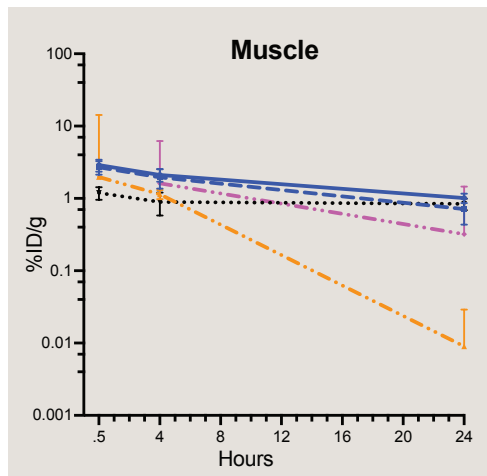

H

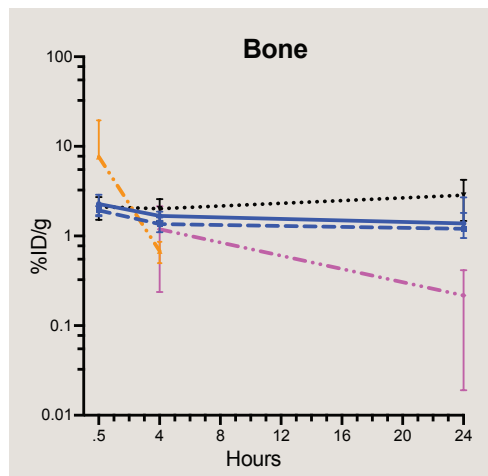

I

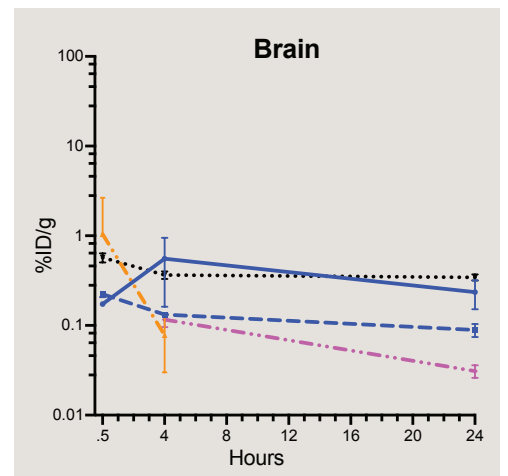

—●— [211At]MABG (SK-N-SH)

—●— [211At]MABG (SK-N-SH<sup>NET/GFP/LUC</sup>)

—●— 131I-MIBG (SK-N-SH<sup>NET/GFP/LUC</sup>)

—●— 125I-MIBG (SK-N-SH<sup>NET/GFP/LUC</sup>)

—●— Sodium astatide (SK-N-SH<sup>NET/GFP/LUC</sup>)
