# Supplementary figures and images for: Preclinical Development of [211At]meta- astatobenzylguanidine ([211At]MABG) as an Alpha Particle Radiopharmaceutical Therapy for Neuroblastoma
Source: PubMed Central journal article supplement — Clin Cancer Res. 2022 Jul 21;28(18):4146–57. doi: 10.1158/1078-0432.CCR-22-0400 (PMC9475242; doi:10.1158/1078-0432.ccr-22-0400), 2022-07-21

Figure S1

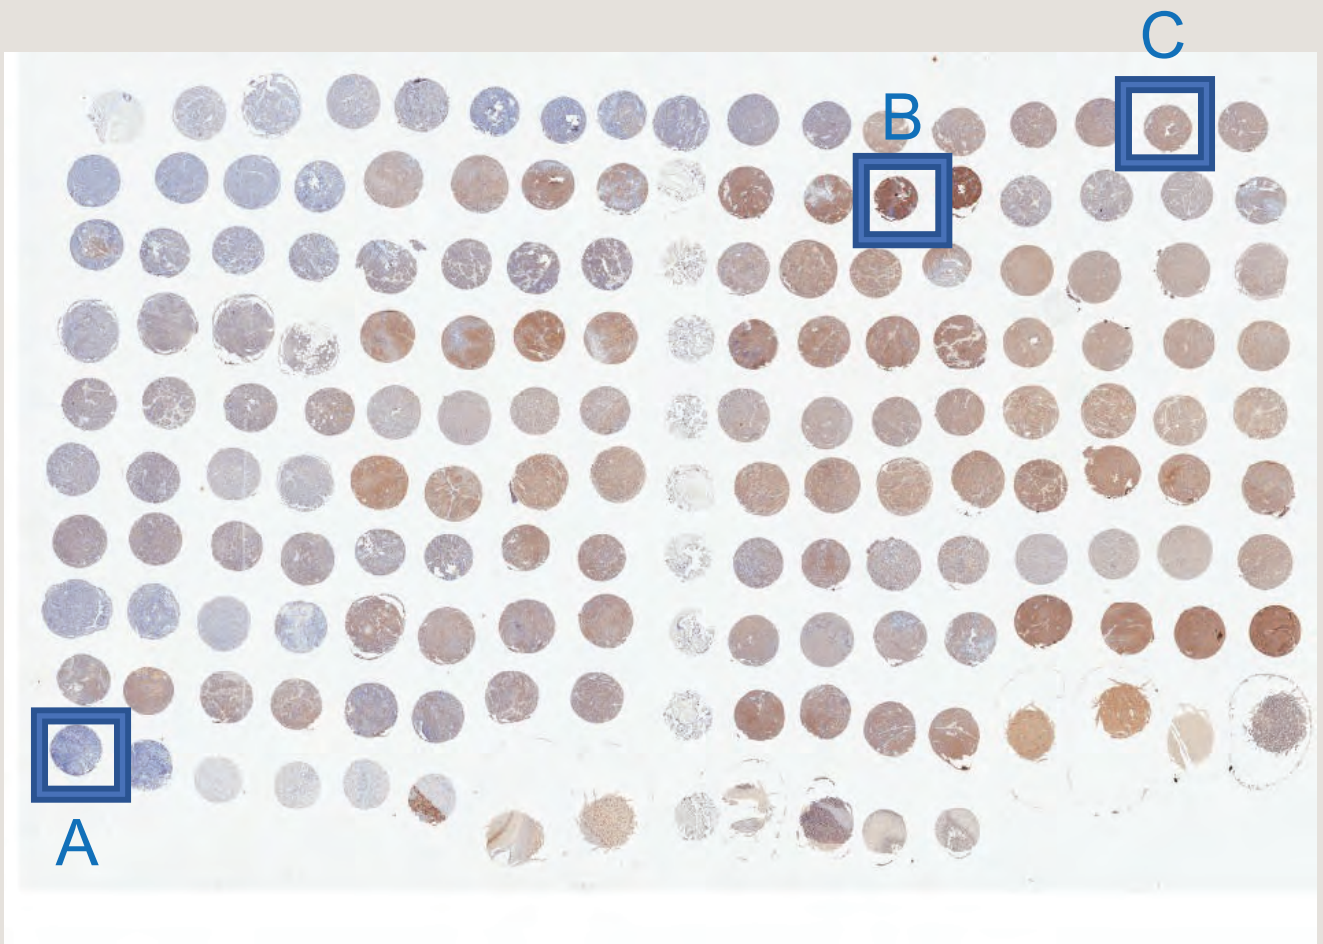

NB PDX TMA

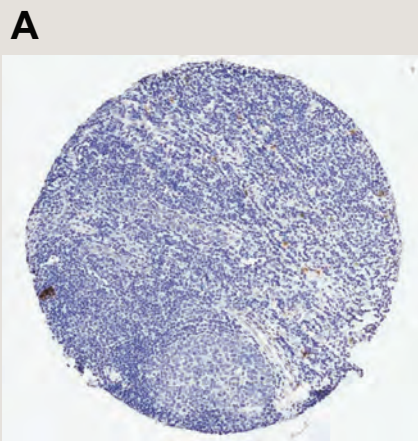

Human Tonsil

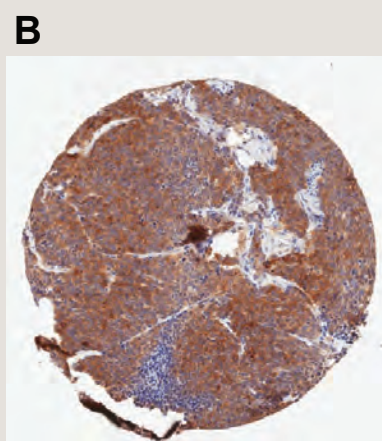

COG-N-453x

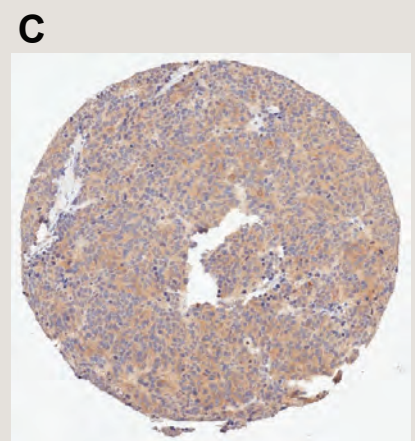

Felix

Supplement: ccr-22-0400_figure_s1_supps1.pdf [file ccr-22-0400_figure_s1_supps1.pdf]

**Figure S3**

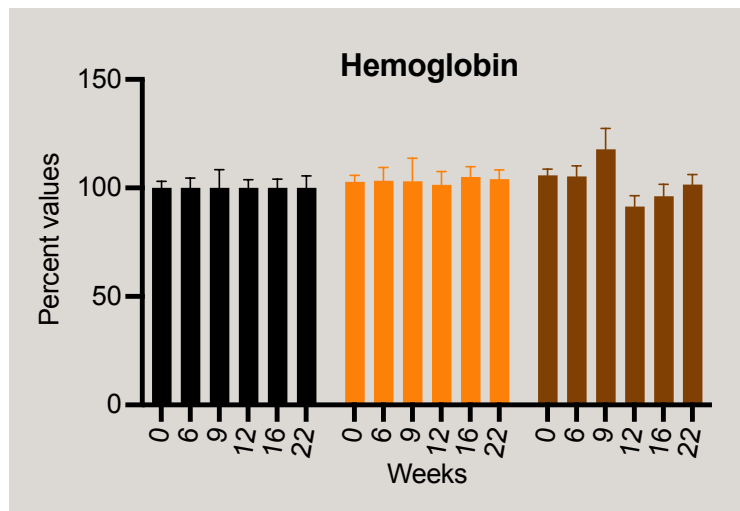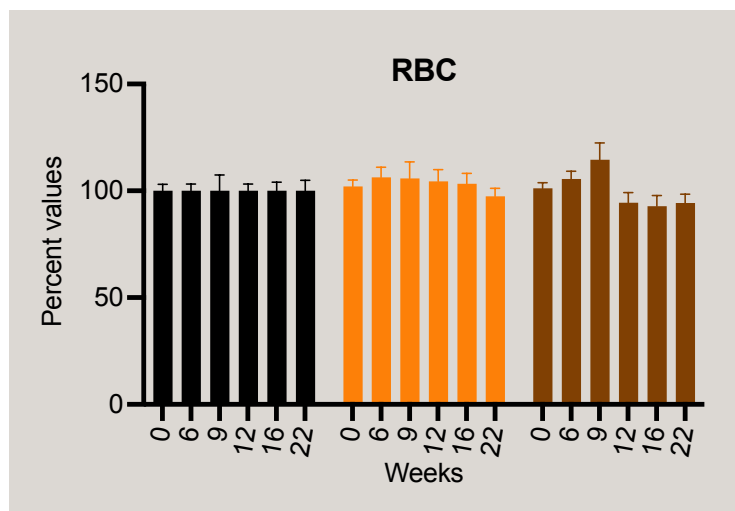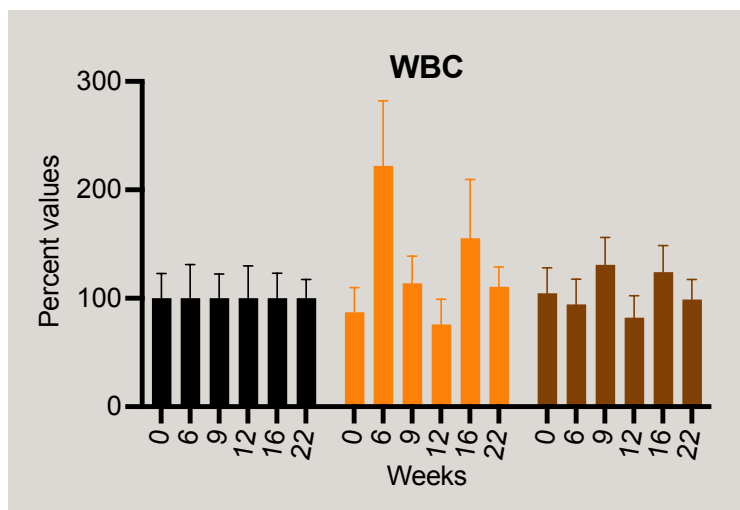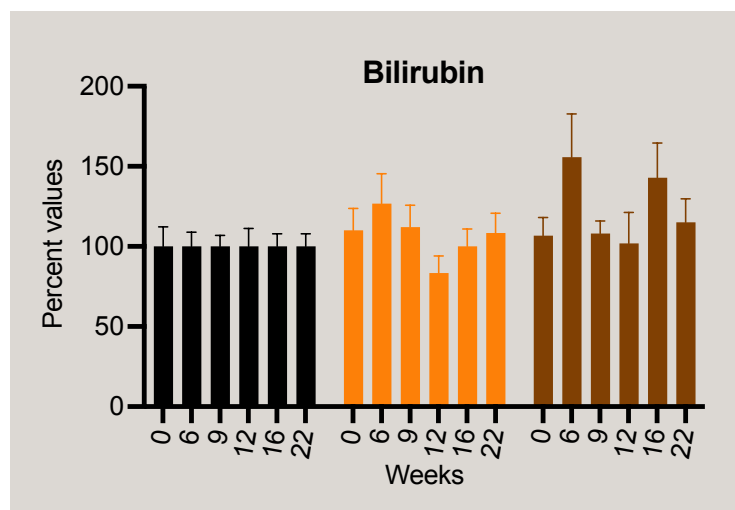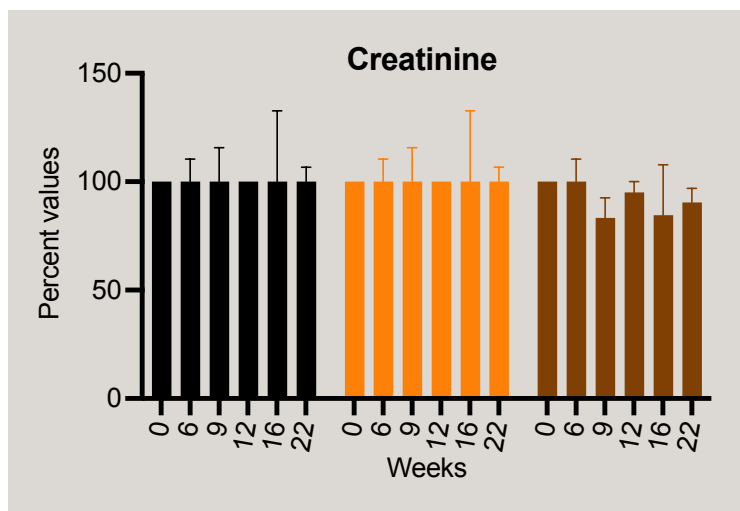

■ Vehicle    ■ [<sup>211</sup>At]MABG: 16.2 MBq/ kg (0.44 mCi/kg)    ■ [<sup>211</sup>At]MABG: 41.8 MBq/ kg (1.12 mCi/kg)

Supplement: ccr-22-0400_figure_s3_supps3.pdf [file ccr-22-0400_figure_s3_supps3.pdf]

Figure S4

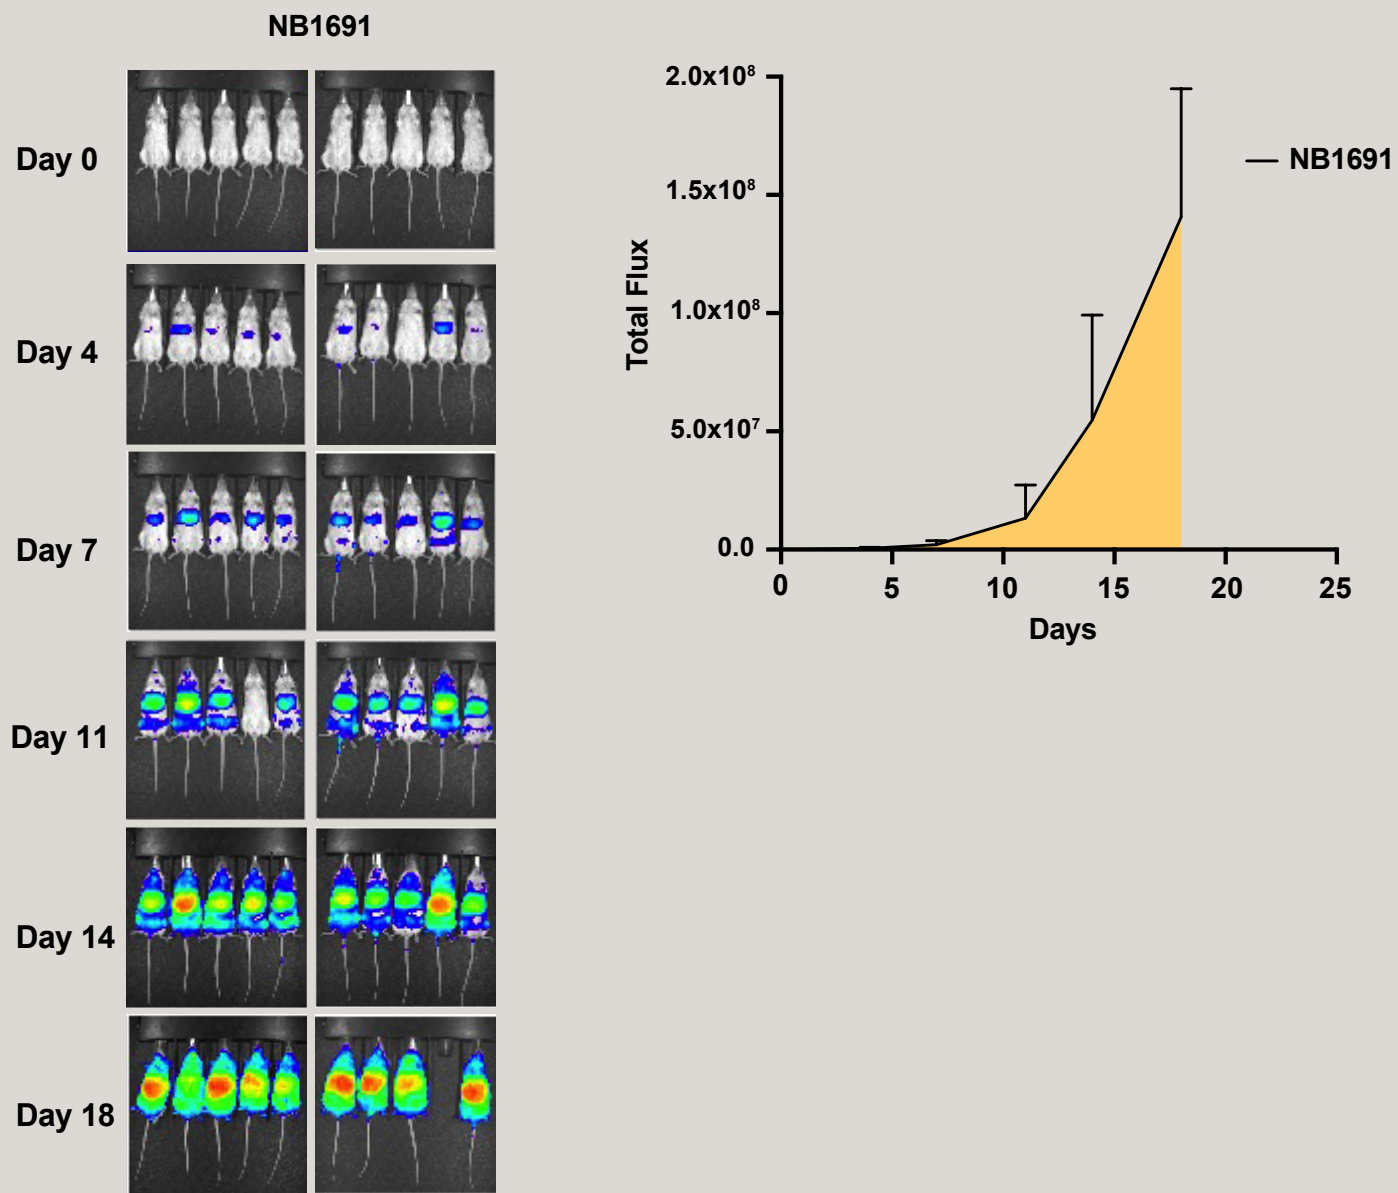

Supplement: ccr-22-0400_figure_s4_supps4.pdf [file ccr-22-0400_figure_s4_supps4.pdf]
